# Supplementary material
Source: MDPI journal article supplement (https://www.mdpi.com/2073-4395/13/10/2473)
Supplement: s1 [file s1]

## Supplementary information

Table S1 Effect of different fertilizer treatments on rice root morphology at heading stage in 2016

| Fertilizer Application Method | Fertilizer type     | Length<br>( $\times 10^2$ cm/hill) | Projected area<br>( $\times 10^2$ cm <sup>2</sup> / hill) | Surface area<br>( $\times 10^2$ cm <sup>2</sup> / hill) | Average diameter<br>(mm) | Root volume<br>(cm <sup>3</sup> / hill) | Tips<br>( $\times 10^4$ / hill) | Dry matter accumulation<br>(t ha <sup>-1</sup> ) |
|-------------------------------|---------------------|------------------------------------|-----------------------------------------------------------|---------------------------------------------------------|--------------------------|-----------------------------------------|---------------------------------|--------------------------------------------------|
| Broadcast                     | CK                  | 211.6 $\pm$ 14.1                   | 11.2 $\pm$ 0.2                                            | 35.2 $\pm$ 0.5                                          | 0.52 $\pm$ 0.03          | 47.1 $\pm$ 2.2                          | 11.6 $\pm$ 1.2                  | 1.27 $\pm$ 0.02                                  |
|                               | SCU                 | 172.7 $\pm$ 14.3                   | 9.2 $\pm$ 0.3                                             | 28.8 $\pm$ 1.0                                          | 0.46 $\pm$ 0.02          | 38.6 $\pm$ 0.4                          | 9.2 $\pm$ 1.6                   | 1.00 $\pm$ 0.01                                  |
|                               | PCU                 | 147.3 $\pm$ 15.8                   | 7.9 $\pm$ 0.8                                             | 25.5 $\pm$ 2.4                                          | 0.47 $\pm$ 0.01          | 29.4 $\pm$ 2.8                          | 8.2 $\pm$ 1.0                   | 0.88 $\pm$ 0.10                                  |
|                               | BBF                 | 183.1 $\pm$ 9.1                    | 9.8 $\pm$ 0.3                                             | 30.6 $\pm$ 0.9                                          | 0.53 $\pm$ 0.01          | 41.0 $\pm$ 0.5                          | 11.1 $\pm$ 1.1                  | 1.15 $\pm$ 0.23                                  |
| Deep placement                | SCU                 | 223.2 $\pm$ 15.2                   | 10.5 $\pm$ 1.0                                            | 32.9 $\pm$ 3.0                                          | 0.48 $\pm$ 0.01          | 39.9 $\pm$ 4.4                          | 15.1 $\pm$ 0.3                  | 1.31 $\pm$ 0.08                                  |
|                               | PCU                 | 164.7 $\pm$ 36.5                   | 8.3 $\pm$ 1.9                                             | 26.0 $\pm$ 6.1                                          | 0.51 $\pm$ 0.01          | 32.8 $\pm$ 8.2                          | 9.4 $\pm$ 2.3                   | 0.97 $\pm$ 0.17                                  |
|                               | BBF                 | 192.4 $\pm$ 4.3                    | 10.5 $\pm$ 0.4                                            | 33.1 $\pm$ 1.2                                          | 0.55 $\pm$ 0.01          | 46.0 $\pm$ 2.4                          | 11.7 $\pm$ 0.2                  | 1.28 $\pm$ 0.03                                  |
|                               | LSD <sub>0.05</sub> | 20.68                              | 1.16                                                      | 3.96                                                    | 0.05                     | 6.21                                    | 1.20                            | 0.15                                             |
| Fertilizer placement (P)      |                     | **                                 | *                                                         | *                                                       | ns                       | *                                       | **                              | **                                               |
| Fertilizer type (T)           |                     | **                                 | **                                                        | **                                                      | **                       | **                                      | **                              | **                                               |
| P $\times$ T                  |                     | *                                  | ns                                                        | ns                                                      | ns                       | ns                                      | **                              | ns                                               |

Notes. CK, high-yield split fertilization of urea; PCU, a polymer-coated urea (4% (w/w) coating, 43% N); SCU, a sulfur-coated urea (37% N); BBF, a bulk blending fertilizer (40% N). ns: not significant ( $P > 0.05$ ), \*: significant at  $P \leq 0.05$ , \*\*: significant at  $P \leq 0.01$ .

Table S2 Effect of different fertilizer treatments on rice plant N content in 2015 and 2016.

| Year    | Fertilizer Application Method | Fertilizer type     | Plant N content (%) |                    |           |           |
|---------|-------------------------------|---------------------|---------------------|--------------------|-----------|-----------|
|         |                               |                     | Tillering           | Panicle initiation | Heading   | Maturity  |
| 2015    | Broadcast                     | CK                  | 3.19±0.02           | 2.32±0.03          | 1.83±0.01 | 1.13±0.01 |
|         |                               | SCU                 | 3.23±0.01           | 2.42±0.04          | 1.62±0.02 | 0.95±0.01 |
|         |                               | PCU                 | 3.11±0.05           | 2.65±0.05          | 1.72±0.01 | 1.00±0.01 |
|         |                               | BBF                 | 3.08±0.03           | 2.54±0.02          | 1.78±0.03 | 1.06±0.01 |
|         | Deep placement                | SCU                 | 3.13±0.1            | 2.52±0.03          | 1.79±0.02 | 1.10±0.02 |
|         |                               | PCU                 | 3.69±0.05           | 2.69±0.10          | 2.02±0.03 | 1.16±0.01 |
|         |                               | BBF                 | 3.14±0.01           | 2.60±0.04          | 1.82±0.01 | 1.12±0.03 |
|         |                               | LSD <sub>0.05</sub> | 0.27                | 0.20               | 0.12      | 0.06      |
| 2016    | Broadcast                     | CK                  | 3.19±0.02           | 1.88±0.04          | 1.56±0.01 | 1.20±0.01 |
|         |                               | SCU                 | 3.23±0.01           | 2.04±0.01          | 1.21±0.02 | 1.03±0.02 |
|         |                               | PCU                 | 2.90±0.08           | 2.70±0.03          | 1.81±0.07 | 1.17±0.02 |
|         |                               | BBF                 | 3.03±0.03           | 2.39±0.06          | 1.60±0.01 | 1.21±0.01 |
|         | Deep placement                | SCU                 | 3.21±0.08           | 2.12±0.02          | 1.27±0.03 | 1.10±0.01 |
|         |                               | PCU                 | 3.18±0.06           | 2.56±0.03          | 2.02±0.03 | 1.27±0.01 |
|         |                               | BBF                 | 3.08±0.05           | 2.36±0.03          | 1.62±0.07 | 1.24±0.01 |
|         |                               | LSD <sub>0.05</sub> | 0.27                | 0.13               | 0.16      | 0.05      |
| P-value | Year (Y)                      |                     | **                  | **                 | **        | **        |
|         | Fertilizer placement (P)      |                     | **                  | ns                 | **        | **        |
|         | Fertilizer type (T)           |                     | *                   | **                 | **        | **        |
|         | Y×P                           |                     | ns                  | ns                 | ns        | *         |
|         | Y×T                           |                     | **                  | **                 | **        | **        |
|         | P×T                           |                     | **                  | ns                 | **        | *         |
|         | Y×P×T                         |                     | ns                  | ns                 | ns        | ns        |

Notes. CK, high-yield split fertilization of urea; PCU, a polymer-coated urea (4% (w/w) coating, 43% N); SCU, a sulfur-coated urea (37% N); BBF, a bulk blending fertilizer (40% N). ns: not significant (P>0.05), \*: significant at P≤0.05, \*\*: significant at P≤ 0.01.
